# Supplementary material for: The Effect of Vitamins on Glaucoma: A Systematic Review and Meta-Analysis
Source: PubMed Central journal article supplement (PMC5872777; doi:10.3390/nu10030359), 2018-03-16
Supplement: nutrients-10-00359-s001.pdf [file nutrients-10-00359-s001.pdf]

## Supplementary appendix

### **The effect of vitamins on glaucoma: a systematic review and meta-analysis**

Ramdas WD, et al.

#### Contents:

|                        |                                                                                                                        |
|------------------------|------------------------------------------------------------------------------------------------------------------------|
| SUPPLEMENTARY TABLE 1: | Summary of the retrieved studies from the systematic review                                                            |
| SUPPLEMENTARY TABLE 2: | Quality assessment of included studies according to the Newcastle-Ottawa Scale*                                        |
| SUPPLEMENTARY TABLE 3: | Blood levels of studies on vitamin blood levels and glaucoma                                                           |
| SUPPLEMENTARY TABLE 4: | Overview of retrieved studies on the association of vitamin blood levels with open-angle glaucoma                      |
| SUPPLEMENTARY TABLE 5: | Overview of retrieved studies on the association of vitamin blood levels (in bold) and intake with open-angle glaucoma |
| SUPPLEMENTARY TABLE 6: | Evidence for association of vitamins with open-angle glaucoma: Judgement of investigators                              |

SUPPLEMENTARY TABLE 1. Summary of the retrieved studies from the systematic review

| STUDY                  | STUDY DESIGN    |              | N (patients, not eyes!) |        |     |      |         |          |        | PREVALENCE  | DEFINITION OF GLAUCOMA                                  | METHOD USED FOR EXPOSURE VARIABLE                                      |
|------------------------|-----------------|--------------|-------------------------|--------|-----|------|---------|----------|--------|-------------|---------------------------------------------------------|------------------------------------------------------------------------|
|                        |                 |              | Glaucoma (undefined)    | (P)OAG | NTG | PACG | PEX/PEG | controls | TOTAL  | cases/total |                                                         |                                                                        |
| Arar, et al. 2016      | cross-sectional | case-control |                         | 20     |     |      |         | 20       | 40     | 50.00       | Based on VF, ONH, slitlamp                              | Electrochemiluminescence                                               |
| Asregadoo, et al. 1979 | cross-sectional | case-control |                         | 38     |     |      |         | 12       | 50     | 0.76        | <i>No full text available</i>                           | <i>No full text available</i>                                          |
| Belmonte, et al. 2011  | cross-sectional | case-control |                         | 48     | 13  |      |         | 78       | 139    | 43.88       | Clinical diagnosis                                      | HPLC, CLEIA                                                            |
| Burgess, et al. 2015   | cross-sectional | case-control |                         | 72     |     |      |         | 72       | 144    | 50.00       | Based on VF, ONH, slitlamp                              | Ultra-high resolution mass spectrometry with C18 liquid chromatography |
| Coban, et al. 2014     | cross-sectional | case-control | 77                      |        |     |      |         | 40       | 117    | 65.81       | Based on VF, ONH, slitlamp                              | CLEIA and food questionnaires                                          |
| Coleman, et al. 2008   | cross-sectional | cohort       | 95                      |        |     |      |         | 1060     | 1155   | 8.23        | Based on VF, ONH                                        | Block Food Frequency Questionnaire                                     |
| Cumurcu, et al. 2006   | cross-sectional | case-control |                         | 25     | 18  |      | 24      | 19       | 86     | 77.91       | Based on IOP, VF, ONH, slitlamp                         | CLEIA                                                                  |
| Engin, et al. 2010     | cross-sectional | case-control | 160                     |        |     |      |         | 31       | 191    | 83.77       | (multicenter study on clinical parameters)              | HPLC                                                                   |
| Giaconi, et al. 2012.  | cross-sectional | case-control | 77                      |        |     |      |         | 507      | 584    | 13.18       | Two glaucomaspecialist based on VF, ONH                 | Block Food Frequency Questionnaire                                     |
| Goncalves, et al. 2015 | cross-sectional | case-control |                         | 150    |     |      |         | 164      | 314    | 47.77       | Based on IOP, VF, ONH                                   | Radioimmunoassay                                                       |
| Goyal, et al. 2014*    | cross-sectional | case-control |                         | 30     |     | 30   |         | 30       | 90     | 66.67       | Clinical diagnosis; age-matched cataract controls       | Spectrophotometry                                                      |
| Gye, et al. 2016       | cross-sectional | cohort       | 2431                    |        |     |      |         | 161598   | 164029 | 1.48        | Fundusphotographs with ISGEO criteria                   | <i>Laboratory analysis not specified</i>                               |
| Iqbal, et al. 1999*    | cross-sectional | case-control |                         |        |     |      |         |          | 58     | NA          | Clinical diagnosis; patients undergoing cataractsurgery | HPLC coupled ECD                                                       |
| Kang, et al. 2003      | prospective     | cohort       |                         | 474    |     |      |         | 116010   | 116484 | 0.41        | self-reported glaucoma confirmed with medical records   | Semiquantitative Food Frequency Questionnaire                          |
| Kang, et al. 2014      | prospective     | cohort       |                         |        |     |      | 399     | 119802   | 120201 | 0.33        | self-reported glaucoma confirmed with medical records   | Semiquantitative Food Frequency Questionnaire                          |
| Kang, et al. 2016      | prospective     | cohort       |                         | 1483   |     |      |         | 103504   | 104987 | 1.41        | self-reported glaucoma confirmed with medical records   | Semiquantitative Food Frequency Questionnaire                          |



|                           |                 |              |                       |     |    |  |  |      |      |       |                                                      |                                      |
|---------------------------|-----------------|--------------|-----------------------|-----|----|--|--|------|------|-------|------------------------------------------------------|--------------------------------------|
|                           | meta-analysis   |              |                       |     |    |  |  |      |      |       |                                                      |                                      |
| Yoo, et al. 2014          | cross-sectional | cohort       | 410 glaucoma suspects | 290 |    |  |  | 5394 | 5684 | 5.10  | Based on IOP, VF, ONH, slitlamp; with ISGEO criteria | Gamma counter with radioimmunoassays |
| Yuki, et al. 2010         | cross-sectional | case-control |                       |     | 47 |  |  | 44   | 104  | 57.69 | Clinical diagnosis                                   | HPLC coupled ECD                     |
| Zanon-Moreno, et al. 2013 | cross-sectional | case-control |                       | 250 |    |  |  | 250  | 500  | 50.00 | Based on IOP, VF, ONH, slitlamp                      | ECD                                  |

\* = These studies only analyzed aqueous humour levels; RCT = Randomized controlled trial; POAG = Primary open-angle glaucoma; NTG = Normal-tension glaucoma; PACG = Primary angle-closure glaucoma; PEX/PEG = Pseudoexfoliation/PEX-glaucoma; VF = Visual field; ONH = Optic nerve head; IOP = Intraocular pressure; RNFL = Retinal nerve fiber layer; HPLC = High performance liquid chromatography; CLEIA = Chemiluminescence enzyme immunoassay; ECD = Electrochemical detection; ELISA = Enzyme-linked immunosorbent assay

SUPPLEMENTARY TABLE 2. Quality assessment of included studies according to the Newcastle-Ottawa Scale\*

| Study                       | Design       | Selection | Comparability | Outcome (cohort) / Exposure (case-control) | Total score (max. 9) |
|-----------------------------|--------------|-----------|---------------|--------------------------------------------|----------------------|
| Arar, et al. 2016           | Case-control | 1         | 0             | 3                                          | 4                    |
| Belmonte, et al. 2011       | Case-control | 2         | 0             | 3                                          | 5                    |
| Burgess, et al. 2015        | Case-control | 3         | 2             | 3                                          | 8                    |
| Coban, et al. 2014          | Case-control | 3         | 1             | 3                                          | 7                    |
| Coleman, et al. 2008        | Cohort       | 4         | 1             | 3                                          | 8                    |
| Cumurcu, et al. 2006        | Case-control | 2         | 2             | 3                                          | 7                    |
| Engin, et al. 2010          | Case-control | 2         | 1             | 3                                          | 6                    |
| Giaconi, et al. 2012.       | Cohort       | 3         | 2             | 3                                          | 8                    |
| Goncalves, et al. 2015      | Case-control | 3         | 2             | 3                                          | 8                    |
| Goyal, et al. 2014          | Case-control | 2         | 1             | 3                                          | 6                    |
| Gye, et al. 2016            | Cohort       | 4         | 1             | 2                                          | 7                    |
| Iqbal, et al. 1999          | Case-control | 1         | 0             | 2                                          | 3                    |
| Kang, et al. 2003           | Cohort       | 3         | 1             | 2                                          | 6                    |
| Kang, et al. 2014           | Cohort       | 3         | 1             | 2                                          | 6                    |
| Kang, et al. 2016           | Cohort       | 3         | 2             | 2                                          | 7                    |
| Krefting, et al. 2014       | RCT          | 4         | 2             | 3                                          | 9                    |
| Lee, et al. 1977            | Case-control | 0         | 0             | 3                                          | 3                    |
| Leibovitzh, et al. 2016     | Cohort       | 3         | 2             | 3                                          | 8                    |
| Li, et al. 2016             | Review       | NA        | NA            | NA                                         | NA                   |
| Lopez-Riquelme, et al. 2014 | Case-control | 3         | 1             | 3                                          | 7                    |
| Lv, et al. 2016             | Case-control | 4         | 1             | 3                                          | 8                    |
| Marcus, et al. 2011         | Review       | NA        | NA            | NA                                         | NA                   |
| Moise, et al. 2012          | Cohort       | 3         | 0             | 2                                          | 5                    |
| Ramdas, et al. 2012         | Cohort       | 4         | 1             | 3                                          | 8                    |
| Ren, et al. 2006            | Case-control | 2         | 0             | 3                                          | 5                    |
| Roedl(1), et al. 2007       | Case-control | 3         | 1             | 3                                          | 7                    |
| Roedl(2), et al. 2007       | Case-control | 3         | 2             | 3                                          | 8                    |
| Rossler, et al. 2010        | Case-control | 3         | 2             | 3                                          | 8                    |
| Turgut, et al. 2010         | Case-control | 4         | 1             | 3                                          | 8                    |
| Turkyilmaz, et al. 2013     | Case-control | 4         | 1             | 3                                          | 8                    |
| Wang, et al. 2013           | Cohort       | 2         | 2             | 3                                          | 7                    |
| Xu, et al. 2011             | Review       | NA        | NA            | NA                                         | NA                   |
| Xu, et al. 2012             | Review       | NA        | NA            | NA                                         | NA                   |
| Yoo, et al. 2014            | Cohort       | 4         | 2             | 3                                          | 9                    |
| Yuki, et al. 2010           | Case-control | 3         | 1             | 3                                          | 7                    |
| Zanon-Moreno, et al. 2013   | Case-control | 3         | 2             | 3                                          | 8                    |

\* = For each of the sections Selection, Comparability, and Outcome/Exposure, a maximum of 4, 2, and 3 points could be given, respectively. Thus the maximum score was 9. A higher score means higher quality.

SUPPLEMENTARY TABLE 3. Blood levels of studies on vitamin blood levels and glaucoma. Presented as mean±standard deviation unless stated otherwise.

| Study <sup>reference no.</sup>    | Vit.    | Glaucoma undefined | POAG          | NTG           | PEX/PEG       | Controls      | Unit   | P-values / Remarks                         | Significant (p<0.05) |
|-----------------------------------|---------|--------------------|---------------|---------------|---------------|---------------|--------|--------------------------------------------|----------------------|
| Belmonte 2011 <sup>17</sup>       | A       |                    | 37.7±13.2     | 30.4±15.8     |               | 37.9±12.0     | ug/dL  | p=0.061                                    | No                   |
| Lopez-Riquelme 2014 <sup>20</sup> | A       |                    | 39.7±13.3     | 30.4±15.8     |               | 37.9±12.0     | ug/dL  | p=0.061                                    | No                   |
| Yuki 2010 <sup>19</sup>           | A       |                    |               | 82.1±26.7     |               | 77.1±30.1     | ug/dL  | p=0.41                                     | No                   |
| Asregadoo 1979 <sup>25</sup>      | B1      |                    | X             |               |               | X             | NA     | Only p-value mentioned (p<0.001)           | Yes                  |
| Roedl(1) 2007 <sup>29</sup>       | B6      |                    | 12.64±6.50    |               |               | 13.46±9.00    | ng/mL  | p=0.65                                     | No                   |
| Roedl(2) 2007 <sup>34</sup>       | B6      |                    |               |               | 10.29±5.73    | 12.54±6.40    | ng/mL  | p=0.029                                    | Yes                  |
| Turgut 2010 <sup>35</sup>         | B6      |                    | 30.22±12.15   | 30.50±11.29   | 22.81±11.71   | 20.09±5.54    | ug/mL  | POAG: p=0.025; NTG: p=0,01; PEX: p>0.05    | Yes/No               |
| Belmonte 2011 <sup>17</sup>       | B9      |                    | 6.7±3.6       | 5.9±3.4       |               | 5.7±2.8       | pg/mL  | p=0.173                                    | No                   |
| Coban 2015 <sup>*26</sup>         | B9      | 7.86±3.15          |               |               |               | 6.9±3.1       | ng/mL  | p=0.144                                    | No                   |
| Cumurcu 2006 <sup>27</sup>        | B9      |                    | 6.24±2.88     | 5.97±1.85     | 4.26±1.69     | 5.93±1.70     | ng/mL  | POAG/NTG: p>0.05; PEX: p<0.009             | No/Yes               |
| Lopez-Riquelme 2014 <sup>20</sup> | B9      |                    | 6.8±3.7       | 5.9±3.4       |               | 5.7±2.8       | ng/mL  | p=0.173                                    | No                   |
| Roedl(1) 2007 <sup>29</sup>       | B9      |                    | 11.76±4.38    |               |               | 12.07±5.78    | ng/mL  | p=0.79                                     | No                   |
| Roedl(2) 2007 <sup>34</sup>       | B9      |                    |               |               | 8.59±4.27     | 11.51±4.74    | ng/mL  | p<0.001                                    | Yes                  |
| Turgut 2010 <sup>35</sup>         | B9      |                    | 11.59±9.40    | 9.71±3.86     | 10.82±4.92    | 9.00±6.39     | ng/mL  | p>0.05                                     | No                   |
| Yuki 2010 <sup>19</sup>           | B9      |                    |               | 8.7±4.3       |               | 8.0±3.1       | ng/mL  | p=0.37                                     | No                   |
| Belmonte 2011 <sup>17</sup>       | B12     |                    | 404.3±198.2   | 471.7±177.6   |               | 425.7±137.7   | pg/mL  | p=0.385                                    | No                   |
| Coban 2015 <sup>*26</sup>         | B12     | 231±135.19         |               |               |               | 272.5±84.54   | pg/mL  | p=0.016                                    | Yes                  |
| Cumurcu 2006 <sup>27</sup>        | B12     |                    | 232.84±67.55  | 262.33±85.94  | 209.37±104.44 | 261.84±126.22 | pg/mL  | POAG/NTG/PEX: p>0.05                       | No                   |
| Lopez-Riquelme 2014 <sup>20</sup> | B12     |                    | 404.2±198.2   | 471.7±177.6   |               | 425.7±137.7   | pg/mL  | p=0.708                                    | No                   |
| Roedl(1) 2007 <sup>29</sup>       | B12     |                    | 461.7±228.9   |               |               | 478.7±266.3   | pg/mL  | p=0.76                                     | No                   |
| Roedl(2) 2007 <sup>34</sup>       | B12     |                    |               |               | 323±129       | 413±170       | pg/mL  | p=0.001                                    | Yes                  |
| Turgut 2010 <sup>35</sup>         | B12     |                    | 368.24±262.65 | 344.46±247.84 | 277.16±139.08 | 345.55±201.75 | pg/mL  | p>0.05                                     | No                   |
| Asregadoo 1979 <sup>25</sup>      | C       |                    | X             |               |               | X             | NA     | Only p-value mentioned (p>0.05)            | No                   |
| Yuki 2010 <sup>19</sup>           | C       |                    |               | 4.6±4.0       |               | 6.3±3.9       | ug/mL  | p=0.04                                     | Yes                  |
| Zanon-Moreno 2013 <sup>38</sup>   | C       |                    | 10.0±1.6      |               |               | 12.0±1.7      | ug/mL  | Gene-interaction (p<0.001 for blood level) |                      |
| Arar 2016 <sup>48</sup>           | D       |                    | 32.31         |               |               | 64.17         | nmol/L | p<0.05                                     | Yes                  |
| Goncalves 2015 <sup>45</sup>      | D       |                    | 42.9±25.7     |               |               | 49.4±29.5     | nmol/L | p=0.039                                    | Yes                  |
| Gye 2016 <sup>49</sup>            | D       | 16.59±7.01         |               |               |               | 15.85±6.96    | ng/mL  | p<0.001                                    | Yes                  |
| Lv 2016 <sup>47</sup>             | D       |                    | 26.37±5.83    |               |               | 30.43±3.91    | ng/mL  | p<0.001                                    | Yes                  |
| Yoo 2014 <sup>46</sup>            | D       | X                  | X             |               |               | X             | ng/dL  | Quintiles                                  | NA                   |
| Belmonte 2011 <sup>17</sup>       | E       |                    | 1050.4±330.5  | 739.9±288.0   |               | 1008.7±232.5  | ug/dL  | p=0.001                                    | Yes                  |
| Lopez-Riquelme 2014 <sup>20</sup> | E       |                    | 1050.4±330.6  | 739.9±288.0   |               | 1008.7±232.5  | ug/dL  | p=0.001                                    | Yes                  |
| Ren 2006 <sup>52</sup>            | E       |                    | 25.3±7.4      |               |               | 28.5±7.8      | umol/L | No p-value mentioned                       | NA                   |
| Yuki 2010 <sup>19</sup>           | E       |                    |               | 1.5±0.6       |               | 1.5±0.6       | mg/dL  | p=0.83                                     | No                   |
| Zanon-Moreno 2013 <sup>38</sup>   | E       |                    | 10.7±1.7      |               |               | 11.4±1.8      | ug/mL  | Gene-interaction (p<0.001 for blood level) | Yes                  |
| Engin 2010 <sup>18</sup>          | A, E    | X                  |               |               |               | X             | NA     | Associated with clinical parameters        | NA                   |
| Wang 2013 <sup>21</sup>           | A, C, E | X                  |               |               |               | X             | ug/dL  | Quintiles                                  | NA                   |

X = No absolute value applicable; \* = median±standard deviation; Vit. = Vitamin; POAG = Primary open-angle glaucoma; NTG = Normal-tension glaucoma; PEX/PEG = Pseudoexfoliation/PEX-glaucoma

SUPPLEMENTARY TABLE 4. Overview of retrieved studies on the association of vitamin blood levels with open-angle glaucoma

| Studies | Lower levels                                        | No effect                                                                                                       | Higher levels                                      |
|---------|-----------------------------------------------------|-----------------------------------------------------------------------------------------------------------------|----------------------------------------------------|
| Vitamin | significant                                         | non-significant                                                                                                 | significant                                        |
| A       |                                                     | Belmonte 2011<br>Engin 2010<br>Lopez-Riquelme 2014<br>Wang 2013<br>Yuki 2010                                    |                                                    |
| B1      | Asregadoo 1979                                      |                                                                                                                 |                                                    |
| B2      |                                                     |                                                                                                                 |                                                    |
| B3      |                                                     |                                                                                                                 |                                                    |
| B6      | Roedl(2) 2007                                       | Roedl(1) 2007                                                                                                   | Turgut 2010                                        |
| B9      | Roedl(2) 2007                                       | Belmonte 2011<br>Coban 2015<br>Cumurcu 2006<br>Lopez-Riquelme 2014<br>Roedl(1) 2007<br>Turgut 2010<br>Yuki 2010 |                                                    |
| B12     | Coban 2015<br>Roedl(2) 2007                         | Belmonte 2011<br>Cumurcu 2006<br>Lopez-Riquelme 2014<br>Roedl(1) 2007<br>Turgut 2010                            |                                                    |
| C       | Yuki 2010<br>Zanon-Moreno 2013                      | Asregadoo 1979<br>Wang 2013                                                                                     |                                                    |
| D       | Arar 2016<br>Goncalves 2015<br>Lv 2016<br>Yoo 2014* | Gye 2016                                                                                                        | Yoo 2014*                                          |
| E       | Zanon-Moreno 2013                                   | Ren 2006<br>Yuki 2010<br>Wang 2013                                                                              | Belmonte 2011<br>Engin 2010<br>Lopez-Riquelme 2014 |

\* = J-shaped association;

Roedl(2) 2007: focused on pseudoexfoliation glaucoma

Yuki 2010: focused on normal-tension glaucoma

SUPPLEMENTARY TABLE 5. Overview of retrieved studies (except of meta-analyses studies) on the association of vitamin blood levels (in bold) and intake with open-angle glaucoma, presented as first author with year of publication [sample size (N); POAG prevalence (%)] quality-score.

| Studies | Lower risk                                                                                                                                 |                                                                                                                           | No effect (OR or RR close to 1.00)                                                                                                                | Higher risk                                                                                                                                        |                                                                                  |
|---------|--------------------------------------------------------------------------------------------------------------------------------------------|---------------------------------------------------------------------------------------------------------------------------|---------------------------------------------------------------------------------------------------------------------------------------------------|----------------------------------------------------------------------------------------------------------------------------------------------------|----------------------------------------------------------------------------------|
|         | significant                                                                                                                                | non-significant                                                                                                           |                                                                                                                                                   | non-significant                                                                                                                                    | significant                                                                      |
| A       | Giaconi 2012 [584; 13.18] 8<br>Ramdas 2012 [3502; 2.60] 8                                                                                  | Coleman 2008 [1155; 8.23] 8<br>Wang 2013 [2912; 6.97] 7                                                                   | Kang 2003 [116484; 0.41] 6<br><b>Belmonte 2011 [139; 43.88] 5</b><br><b>Lopez-Riquelme 2014 [138; 45.65] 7</b><br><b>Wang 2013 [2912; 6.97] 7</b> |                                                                                                                                                    |                                                                                  |
| B1      | Ramdas 2012 [3502; 2.60] 8<br><b>Asregadoo 1979 [50, 79.00] NA</b>                                                                         | Giaconi 2012 [584; 13.18] 8                                                                                               |                                                                                                                                                   | Coleman 2008 [1155; 8.23] 8                                                                                                                        |                                                                                  |
| B2      | Coleman 2008 [1155; 8.23] 8                                                                                                                | Giaconi 2012 [584; 13.18] 8                                                                                               |                                                                                                                                                   |                                                                                                                                                    |                                                                                  |
| B3      |                                                                                                                                            | Giaconi 2012 [584; 13.18] 8                                                                                               |                                                                                                                                                   | Coleman 2008 [1155; 8.23] 8                                                                                                                        |                                                                                  |
| B6      |                                                                                                                                            | Giaconi 2012 [584; 13.18] 8<br><b>Roedl(1) 2007 [78; 50.00] 7</b>                                                         | Coleman 2008 [1155; 8.23] 8                                                                                                                       |                                                                                                                                                    | <b>Turgut 2010 [156; 74.36] 8</b>                                                |
| B9      | Giaconi 2012 [584; 13.18] 8                                                                                                                | <b>Roedl(1) 2007 [78; 50.00] 7</b><br>Cumurcu 2006 [86; 77.91] 7                                                          | Coleman 2008 [1155; 8.23] 8                                                                                                                       | <b>Belmonte 2011 [139; 43.88] 5</b><br>Coban 2014 [117; 65.81] 7<br><b>Lopez-Riquelme 2014 [138; 45.65] 7</b><br><b>Turgut 2010 [156; 74.36] 8</b> |                                                                                  |
| B12     | <b>Coban 2014 [117; 65.81] 7</b>                                                                                                           | <b>Belmonte 2011 [139; 43.88] 5</b><br><b>Lopez-Riquelme 2014 [138; 45.65] 7</b><br><b>Roedl(1) 2007 [78; 50.00] 7</b>    | Ramdas 2012 [3502; 2.60] 8                                                                                                                        | <b>Cumurcu 2006 [86; 77.91] 7</b><br><b>Turgut 2010 [156; 74.36] 8</b>                                                                             |                                                                                  |
| C       | Giaconi 2012 [584; 13.18] 8<br>Wang 2013 [2912; 6.97] 7<br>Moise 2012 [500; 5.00] 5<br><b>Zanon-Moreno 2013 [500; 50.00] 8</b>             | Kang 2003 [116484; 0.41] 6                                                                                                | <b>Wang 2013 [2912; 6.97] 7</b><br><b>Asregadoo 1979 [50, 79.00] NA</b>                                                                           | Coleman 2008 [1155; 8.23] 8                                                                                                                        |                                                                                  |
| D       | <b>Arar 2016 [40; 50.00] 4</b><br><b>Goncalves 2015 [314; 47.77] 8</b><br><b>Lv 2016 [144; 49.31] 8</b><br><b>Yoo 2014* [5684; 5.10] 9</b> |                                                                                                                           | Giaconi 2012 [584; 13.18] 8<br><b>Gye 2016 [164029; 1.48] 7</b>                                                                                   |                                                                                                                                                    | <b>Yoo 2014* [5684; 5.10] 9</b>                                                  |
| E       | <b>Zanon-Moreno 2013 [500; 50.00] 8</b>                                                                                                    | Coleman 2008 [1155; 8.23] 8<br>Giaconi 2012 [584; 13.18] 8<br>Kang 2003 [116484; 0.41] 6<br><b>Ren 2006 [18; 55.56] 5</b> | <b>Wang 2013 [2912; 6.97] 7</b>                                                                                                                   | Ramdas 2012 [3502; 2.60] 8<br>Wang 2013 [2912; 6.97] 7                                                                                             | <b>Belmonte 2011 [139; 43.88] 5</b><br><b>Lopez-Riquelme 2014 [138; 45.65] 7</b> |

Vit. = Vitamin; OR = Odds ratio; RR = Risk ratio; \* = J-shaped association;



SUPPLEMENTARY TABLE 6. Evidence for association of vitamins with open-angle glaucoma:  
Judgement of investigators

| Vitamin | WDR      | JSS      | CAW      | Mean score | Association with OAG |
|---------|----------|----------|----------|------------|----------------------|
| A       | Definite | Possible | Probable | 2.000      | Probably associated  |
| B1      | Probable | Not      | Possible | 1.000      | Possibly associated  |
| B2      | Possible | Possible | Possible | 1.000      | Possibly associated  |
| B3      | Not      | Not      | Not      | 0.000      | Not associated       |
| B6      | Not      | Not      | Possible | 0.333      | Not associated       |
| B9      | Possible | Not      | Possible | 0.667      | Possibly associated  |
| B12     | Not      | Not      | Possible | 0.333      | Not associated       |
| C       | Probable | Possible | Probable | 1.667      | Probably associated  |
| D       | Possible | Possible | Probable | 1.333      | Possibly associated  |
| E       | Not      | Not      | Not      | 0.000      | Not associated       |

OAG = Open-angle glaucoma
